# Supplementary material for: Brassinosteroid Priming Improves Peanut Drought Tolerance via Eliminating Inhibition on Genes in Photosynthesis and Hormone Signaling
Source: PubMed Central journal article supplement (PMC7465412; doi:10.3390/genes11080919), 2020-08-11
Supplement: genes-11-00919-s001.pdf [file genes-11-00919-s001.pdf]

**Table 1.** The relationship between the SRA accession number, treatments and data in NCBI.

| SRA number  | Treatments# | Data name                                                            |
|-------------|-------------|----------------------------------------------------------------------|
| SRR11659571 | W7-1        | R1908096_BKDL190834194-1a_1.fq.gz, R1908096_BKDL190834194-1a_2.fq.gz |
| SRR11659570 | W7-2        | R1908097_BKDL190834195-1a_1.fq.gz, R1908097_BKDL190834195-1a_2.fq.gz |
| SRR11659569 | W7-3        | R1908098_BKDL190834196-1a_1.fq.gz, R1908098_BKDL190834196-1a_2.fq.gz |
| SRR11659564 | PW7-1       | R1908102_BKDL190834200-1a_1.fq.gz, R1908102_BKDL190834200-1a_2.fq.gz |
| SRR11659563 | PW7-2       | R1908103_BKDL190834201-1a_1.fq.gz, R1908103_BKDL190834201-1a_2.fq.gz |
| SRR11659562 | PW7-3       | R1908104_BKDL190834202-1a_1.fq.gz, R1908104_BKDL190834202-1a_2.fq.gz |
| SRR11659568 | D7-1        | R1908099_BKDL190834197-1a_1.fq.gz, R1908099_BKDL190834197-1a_2.fq.gz |
| SRR11659567 | D7-2        | R1908100_BKDL190834198-1a_1.fq.gz, R1908100_BKDL190834198-1a_2.fq.gz |
| SRR11659565 | D7-3        | R1908101_BKDL190834199-1a_1.fq.gz, R1908101_BKDL190834199-1a_2.fq.gz |
| SRR11659561 | PD7-1       | R1908105_BKDL190834203-1a_1.fq.gz, R1908105_BKDL190834203-1a_2.fq.gz |
| SRR11659560 | PD7-2       | R1908106_BKDL190834204-1a_1.fq.gz, R1908106_BKDL190834204-1a_2.fq.gz |
| SRR11659559 | PD7-3       | R1908107_BKDL190834205-1a_1.fq.gz, R1908107_BKDL190834205-1a_2.fq.gz |
| SRR11659558 | W14-1       | R1908108_BKDL190834206-1a_1.fq.gz, R1908108_BKDL190834206-1a_2.fq.gz |
| SRR11659557 | W14-2       | R1908109_BKDL190834207-1a_1.fq.gz, R1908109_BKDL190834207-1a_2.fq.gz |
| SRR11659556 | W14-3       | R1908110_BKDL190834208-1a_1.fq.gz, R1908110_BKDL190834208-1a_2.fq.gz |
| SRR11659551 | PW14-1      | R1908114_BKDL190834212-1a_1.fq.gz, R1908114_BKDL190834212-1a_2.fq.gz |
| SRR11659550 | PW14-2      | R1908115_BKDL190834213-1a_1.fq.gz, R1908115_BKDL190834213-1a_2.fq.gz |
| SRR11659549 | PW14-3      | R1908116_BKDL190834214-1a_1.fq.gz, R1908116_BKDL190834214-1a_2.fq.gz |
| SRR11659554 | D14-1       | R1908111_BKDL190834209-1a_1.fq.gz, R1908111_BKDL190834209-1a_2.fq.gz |
| SRR11659553 | D14-2       | R1908112_BKDL190834210-1a_1.fq.gz, R1908112_BKDL190834210-1a_2.fq.gz |
| SRR11659552 | D14-3       | R1908113_BKDL190834211-1a_1.fq.gz, R1908113_BKDL190834211-1a_2.fq.gz |
| SRR11659548 | PD14-1      | R1908117_BKDL190834215-1a_1.fq.gz, R1908117_BKDL190834215-1a_2.fq.gz |
| SRR11659547 | PD14-2      | R1908118_BKDL190834216-1a_1.fq.gz, R1908118_BKDL190834216-1a_2.fq.gz |
| SRR11659546 | PD14-3      | R1908119_BKDL190834217-1a_1.fq.gz, R1908119_BKDL190834217-1a_2.fq.gz |

# Note: -1, -2, -3 for replicates.

**Table 2.** Effects of seed priming with brassinolide on plant height of peanut under well-watered and drought conditions.

| BR concentrations (ppm) | Well-watered | Drought      | Ratio of Drought/Well-watered | Ratio of priming/no priming under well-watered | Ratio of priming/no priming under drought |               |
|-------------------------|--------------|--------------|-------------------------------|------------------------------------------------|-------------------------------------------|---------------|
| 7 days                  | 0.00         | 18.35±0.14b  | 12.93±0.96b*                  | 70.46±5.82b                                    | --                                        | --            |
|                         | 0.05         | 15.81±1.56b  | 12.72±1.19b                   | 80.42±0.39ab                                   | 86.16±7.85b                               | 99.00±16.67a  |
|                         | 0.10         | 22.08±2.00a  | 17.64±0.39a                   | 80.30±9.10ab                                   | 120.29±10.02a                             | 146.40±6.46a  |
|                         | 0.15         | 19.13±1.11ab | 18.45±1.27a                   | 96.83±12.35a                                   | 104.23±5.29ab                             | 125.71±24.99a |
|                         | 0.20         | 16.67±0.47b  | 14.93±0.11b*                  | 89.61±3.19ab                                   | 90.84±1.84b                               | 99.43±30.97a  |
| 14 days                 | 0.00         | 19.25±0.12b  | 16.55±1.47ab                  | 85.92±7.11a                                    | --                                        | --            |
|                         | 0.05         | 16.92±1.83b  | 13.58±1.03b                   | 80.42±2.60a                                    | 87.90±10.10b                              | 82.69±13.63a  |
|                         | 0.10         | 25.60±1.00a  | 14.61±1.40b*                  | 57.24±7.74b                                    | 132.97±4.34a                              | 89.07±16.46a  |
|                         | 0.15         | 25.99±1.78a  | 19.32±1.26a*                  | 74.32±0.23a                                    | 135.05±10.15a                             | 117.55±18.15a |
|                         | 0.20         | 20.00±3.76b  | 15.19±1.15b                   | 76.75±8.66a                                    | 103.99±20.27ab                            | 92.49±15.27a  |

Note: Data represent mean ± standard error; Letters after data represent statistical significance at  $p < 0.05$  with Least Significant Difference (LSD) test. \* represent statistically significant difference ( $p < 0.05$ ) between well-watered and drought conditions.

**Table 3.** Effects of BR priming on biomass of peanut plants under well-watered and drought conditions.

| BR concentrations(ppm) | DWR (g)      |             | DWS (g)      |             | DWL (g)      |             |            |
|------------------------|--------------|-------------|--------------|-------------|--------------|-------------|------------|
|                        | Well-watered | Drought     | Well-watered | Drought     | Well-watered | Drought     |            |
| 7 days                 | 0.00         | 0.25±0.01b  | 0.22±0.02b   | 1.20±0.08ab | 0.86±0.09b   | 2.11±0.03ab | 1.75±0.07c |
|                        | 0.05         | 0.28±0.01b  | 0.24±0.01ab  | 1.10±0.14ab | 0.89±0.19b   | 2.23±0.27ab | 1.95±0.04b |
|                        | 0.10         | 0.34±0.01a  | 0.26±0.01a   | 1.23±0.07a  | 1.10±0.04a   | 2.55±0.01a  | 2.30±0.06a |
|                        | 0.15         | 0.35±0.01a  | 0.28±0.01a   | 1.36±0.10a  | 1.20±0.07a   | 2.22±0.25ab | 2.25±0.19a |
|                        | 0.20         | 0.25±0.02b  | 0.23±0.02b   | 1.01±0.05b  | 0.83±0.19b   | 1.76±0.10b  | 1.63±0.18c |
| 14 days                | 0.00         | 0.48±0.02a  | 0.34±0.02b   | 2.81±0.14bc | 1.64±0.07b   | 4.13±0.37b  | 2.69±0.10b |
|                        | 0.05         | 0.42±0.01ab | 0.29±0.01b   | 2.86±0.26bc | 1.76±0.09b   | 4.47±0.21b  | 2.53±0.29b |
|                        | 0.10         | 0.44±0.05ab | 0.38±0.01ab  | 3.04±0.08a  | 1.81±0.11b   | 5.33±0.04a* | 3.07±0.18a |
|                        | 0.15         | 0.51±0.02a  | 0.41±0.03a   | 3.06±0.18a* | 2.05±0.11a   | 5.34±0.06a* | 3.14±0.29a |
|                        | 0.20         | 0.32±0.01b  | 0.27±0.01b   | 2.64±0.21c  | 1.42±0.04b   | 3.86±0.36b  | 2.05±0.09c |

Note: Data represent mean ± standard error; Letters after value represent statistical significance at  $p < 0.05$  with Least significant Difference (LSD) test. \* represent statistically significant difference ( $p < 0.05$ ) between well-watered and drought conditions. DWR, DWS and DWL represent dry weight of roots, stems, and leaves.

**Table 4.** Effects of BR priming on peanut yield components under well-watered and drought conditions.

| BR concentrations (ppm) |              | Number of      | Hundred pod   | Hundred kernel weight | Shelling rate |
|-------------------------|--------------|----------------|---------------|-----------------------|---------------|
|                         |              | Pods per plant | weight (g)    | (g)                   | (%)           |
| 0.00 ppm                | Well-watered | 9.6±1.67a      | 75.8±1.07a    | 30.8±0.43a            | 71.6±1.01a    |
|                         | 7d drought   | 10.0±0.00a     | 67.5±0.95b    | 27.9±0.30b            | 71.9±1.02a    |
|                         | 14d drought  | 7.6±1.14b      | 59.2±0.88c    | 24.6±0.34c            | 71.6±0.91a    |
| 0.15 ppm                | Well-watered | 14.5±1.64a**   | 85.8b±1.21b** | 39.2b±0.55b**         | 77.0±1.09a**  |
|                         | 7d drought   | 15.3±2.08a**   | 97.4a±1.38a** | 43.0a±0.61a**         | 74.5±0.85b*   |
|                         | 14d drought  | 9.6±1.52b*     | 63.25±0.89c*  | 27.6±0.39c*           | 74.1±1.05b*   |

Note: Data are presented as the mean ± standard error (n =3). Letters after the value represent the statistically significant difference between each BR concentration ( $p < 0.05$ ) as determined by the LSD test. \* and \*\* represent the statistically significant difference at  $p < 0.05$  and  $p < 0.01$ , respectively, between 0.15 ppm BR priming and 0 ppm BR priming. 7d, 7 days; 14d, 14 days.

**Table 5.** Effects of BR priming on kernel quality of peanut under well-watered and drought conditions.

| BR treatments | Oil content (%) | Protein content (%) |             |
|---------------|-----------------|---------------------|-------------|
|               |                 |                     |             |
| 0.00 ppm      | Well-watered    | 50.79±0.13ab        | 28.13±0.12b |
|               | 7d drought      | 51.01±0.50a         | 29.37±0.21a |
|               | 14d drought     | 49.53±0.47b         | 27.90±0.19b |
| 0.15 ppm      | Well-watered    | 52.96±0.20a         | 28.95±0.70c |
|               | 7d drought      | 51.60±0.41b         | 30.95±0.84a |
|               | 14d drought     | 50.30±0.11c         | 29.97±0.68b |

Note: Data are expressed as the mean  $\pm$  S.E. (n = 3). Different letters within each growth stage are significantly different ( $P < 0.05$ ) as determined by the LSD test. \* represents the comparison between 0.15 ppm with 0 ppm.

**Table 6.** Differentially expressed genes in plant hormone signaling pathways.

| DEG id in peanut genome          | Name in pathway* | Associated hormone |
|----------------------------------|------------------|--------------------|
| arahy.Tifrunner.gnm1.ann1.WH4ILY | PP2C06           | ABA                |
| arahy.Tifrunner.gnm1.ann1.WG90F5 | PP2C51           | ABA                |
| arahy.Tifrunner.gnm1.ann1.52QCLV | PP2CA            | ABA                |
| arahy.Tifrunner.gnm1.ann1.CD5B6Y | PP2CA            | ABA                |
| arahy.Tifrunner.gnm1.ann1.VQ5KVR | PYL4             | ABA                |
| arahy.Tifrunner.gnm1.ann1.BWHT07 | SRK2F            | ABA                |
| arahy.Tifrunner.gnm1.ann1.944YYF | AUX28            | auxin              |
| arahy.Tifrunner.gnm1.ann1.UBHF2S | AUX28            | auxin              |
| arahy.Tifrunner.gnm1.ann1.2G66YZ | GH3.1            | auxin              |
| arahy.Tifrunner.gnm1.ann1.IM1JRZ | GH3.10           | auxin              |
| arahy.Tifrunner.gnm1.ann1.4F6GHG | GH3.11           | auxin              |
| arahy.Tifrunner.gnm1.ann1.0UWS9P | GH3.6            | auxin              |
| arahy.Tifrunner.gnm1.ann1.7FN9BJ | GH3.6            | auxin              |
| arahy.Tifrunner.gnm1.ann1.CB6084 | IAA14            | auxin              |
| arahy.Tifrunner.gnm1.ann1.QUY0YV | IAA14            | auxin              |
| arahy.Tifrunner.gnm1.ann1.D33YE9 | AUX1             | auxin              |
| arahy.Tifrunner.gnm1.ann1.UGVD7A | AUX1             | auxin              |
| arahy.Tifrunner.gnm1.ann1.45C8U1 | AUX3             | auxin              |
| arahy.Tifrunner.gnm1.ann1.LRNE2N | AUX3             | auxin              |
| arahy.Tifrunner.gnm1.ann1.R5YX1M | AUX4             | auxin              |
| arahy.Tifrunner.gnm1.ann1.32LLN4 | SAUR50           | auxin              |
| arahy.Tifrunner.gnm1.ann1.VDQ89P | XTH23            | auxin              |
| arahy.Tifrunner.gnm1.ann1.6IE7Q2 | BAK1             | BR                 |
| arahy.Tifrunner.gnm1.ann1.DH99G0 | BAK1             | BR                 |
| arahy.Tifrunner.gnm1.ann1.2LG1YU | BKI1             | BR                 |
| arahy.Tifrunner.gnm1.ann1.R40G9H | AHP4             | Cytokinin          |
| arahy.Tifrunner.gnm1.ann1.D687JL | ARR9             | Cytokinin          |
| arahy.Tifrunner.gnm1.ann1.223T1K | AHP1             | Cytokinin          |
| arahy.Tifrunner.gnm1.ann1.5X1YG2 | AHP4             | Cytokinin          |
| arahy.Tifrunner.gnm1.ann1.FQ5ZUR | ARR9             | Cytokinin          |
| arahy.Tifrunner.gnm1.ann1.QLL4PD | ARR9             | Cytokinin          |
| arahy.Tifrunner.gnm1.ann1.99WGGU | GID1B            | GA                 |
| arahy.Tifrunner.gnm1.ann1.4I27IK | PIF4             | GA                 |
| arahy.Tifrunner.gnm1.ann1.QKV9FM | PIL15            | GA                 |
| arahy.Tifrunner.gnm1.ann1.TPQ86D | JAZ              | JA                 |
| arahy.Tifrunner.gnm1.ann1.0B8THM | PRB1             | SA                 |
| arahy.Tifrunner.gnm1.ann1.FW2V6H | PRB1             | SA                 |
| arahy.Tifrunner.gnm1.ann1.W4QI9P | TGA10            | SA                 |

\*Note: the pathway is referred to as KEGG plant hormone signaling pathway (id ath04075), accessed on April 29<sup>th</sup>, 2020.
